# Supplementary material
Source: PubMed Central journal article supplement (PMC5715728)
Supplement: NIHMS919806-supplement-supplement_1.pdf [file NIHMS919806-supplement-supplement_1.pdf]

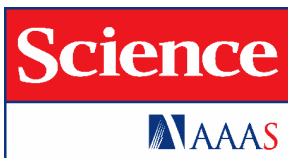

## Supplementary Materials for

### **Atomic structure of the human cytomegalovirus capsid with its securing tegument layer of pp150**

Xuekui Yu,\* Jonathan Jih,\* Jiansen Jiang, Z. Hong Zhou†

\*These authors contributed equally to this work.

†Corresponding author. Email: hong.zhou@ucla.edu

Published 30 June 2017, *Science* **356**, eaam6892 (2017)

DOI: 10.1126/science.aam6892

#### **This PDF file includes:**

Figs. S1 to S10  
References

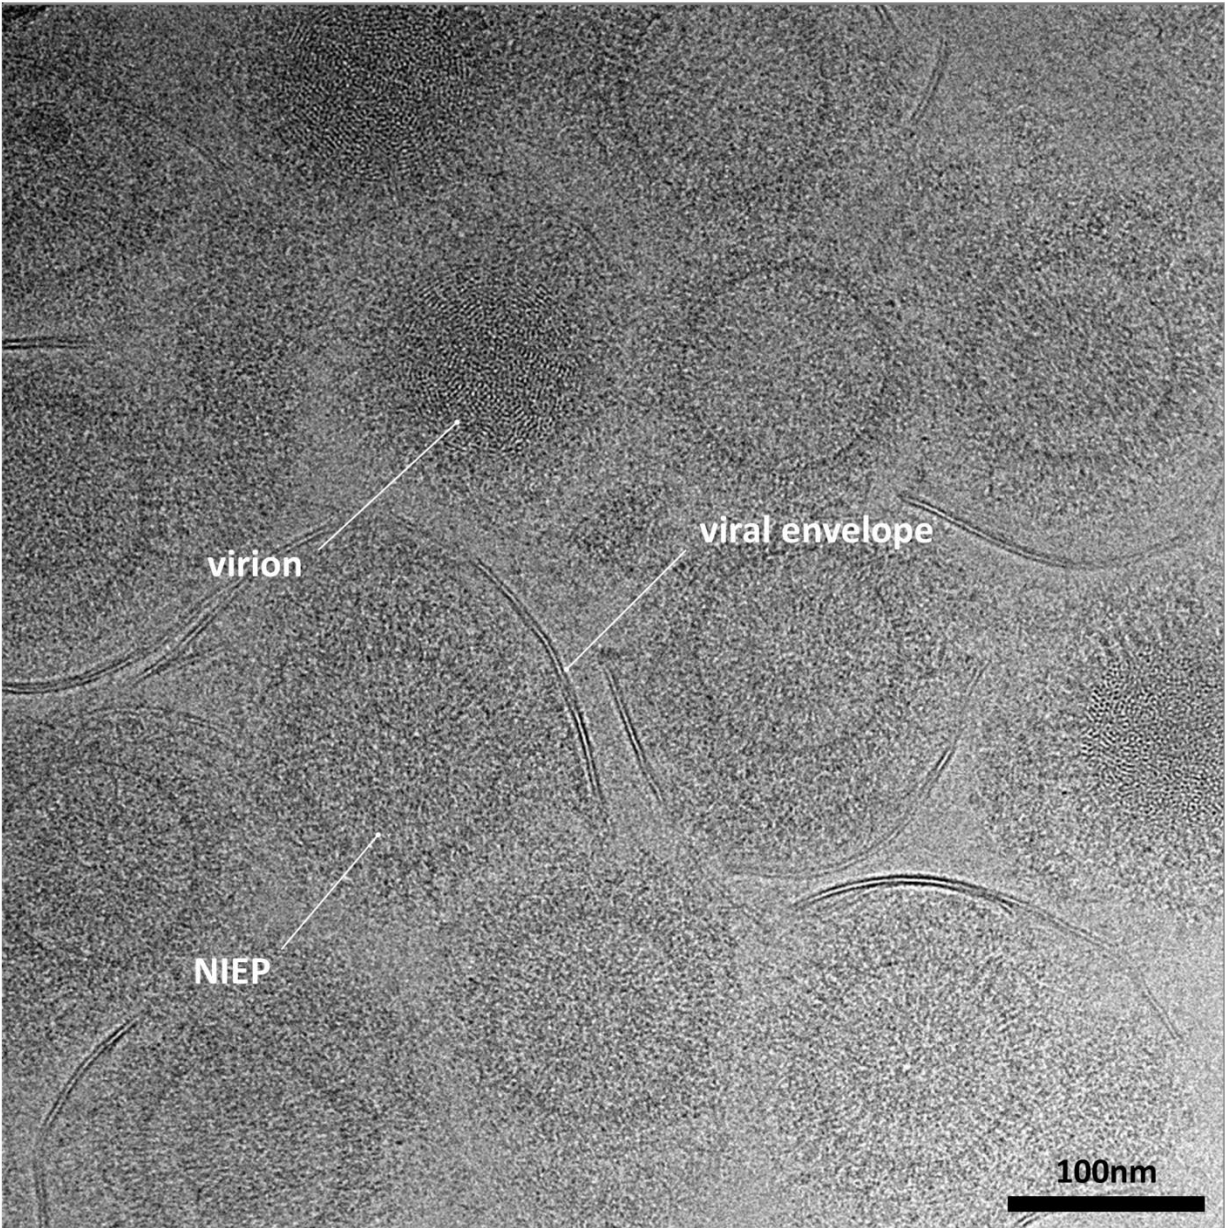

7

8

9 **Figure S1. CryoEM imaging of HCMV particles.** Image recorded using a Gatan K2 Summit

10 direct electron detector shows two types of particles in our sample preparation: DNA-containing

11 and DNA-devoid, corresponding to infectious virion and noninfectious enveloped particles

12 (NIEPs), respectively. Scale bar denotes 100 nm.

13

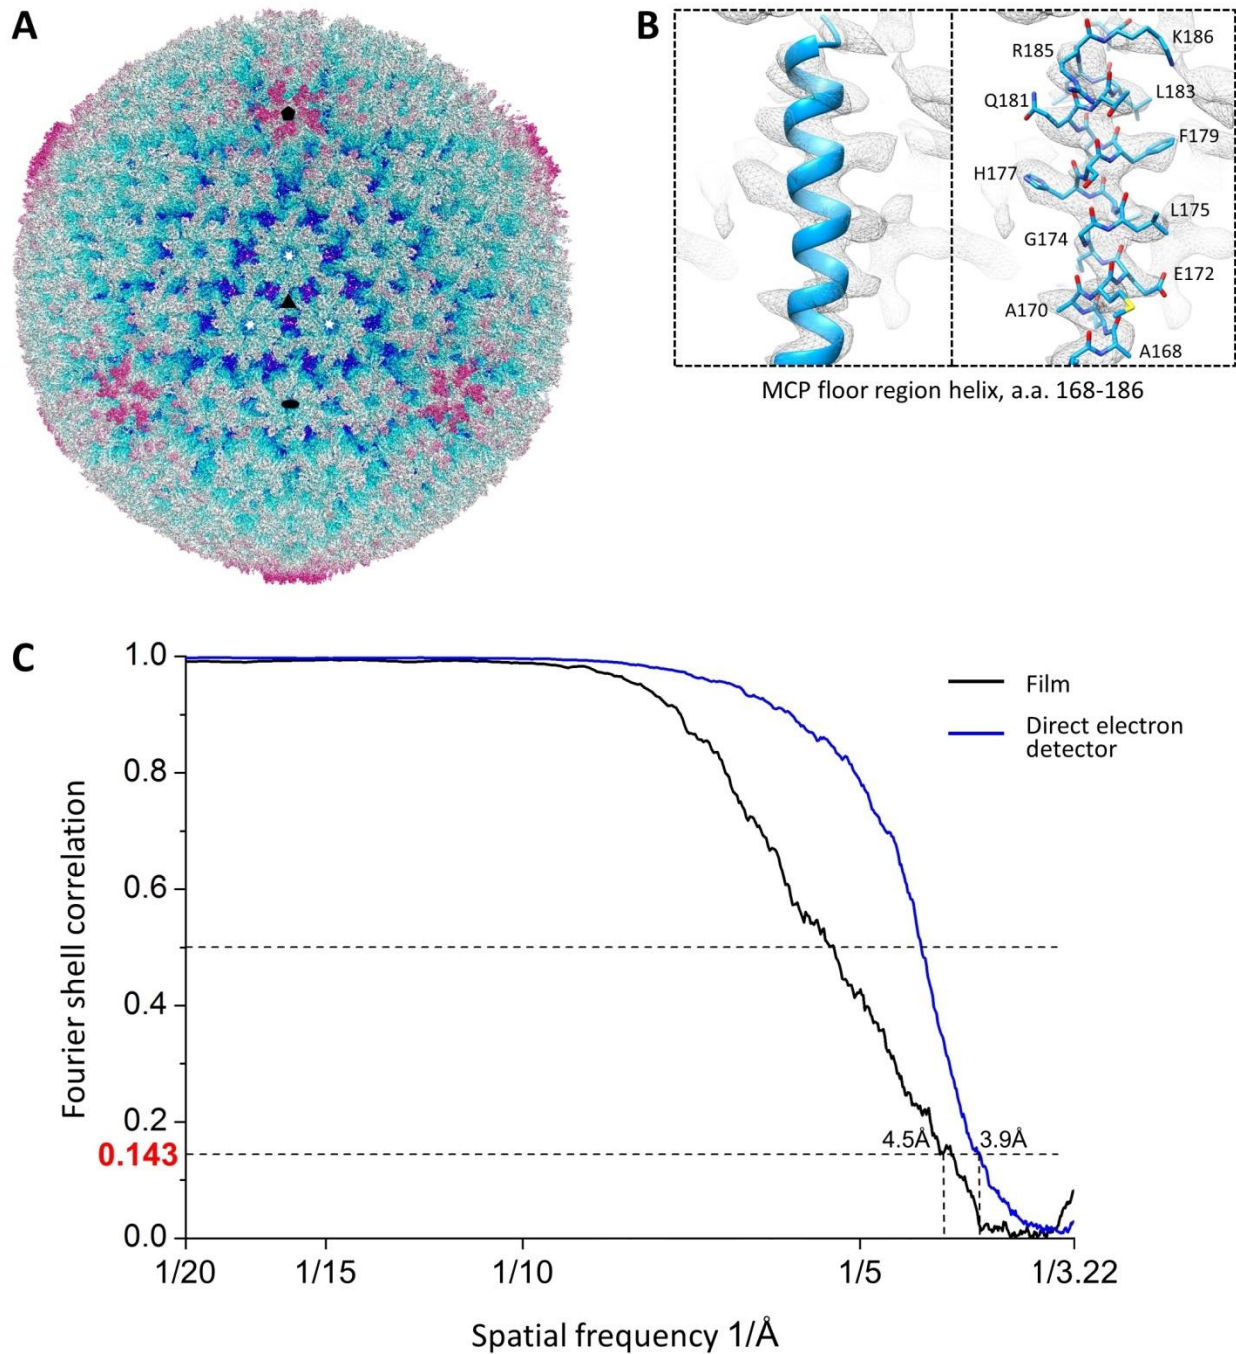

14

15

16 **Figure S2. Reconstructions of HCMV particles and resolution assessment.** (A) Radially  
 17 colored 4.5-Å resolution reconstruction of HCMV obtained from film images, viewed along a  
 18 threefold axis. fivefold, threefold, and twofold axes are indicated by a pentagon, triangle, and

19 oval, respectively. **(B)** Close-up views of MCP floor region helical density (mesh) from the 4.5-  
20 Å reconstruction superposed with ribbon and stick MCP models in left and right panels,  
21 respectively. **(C)** Comparison of resolution assessments of the initial 4.5-Å film-based  
22 reconstruction (black curve) and subsequent 3.9-Å reconstruction (blue curve) obtained from  
23 direct electron detection imaging. Resolutions were determined using a reference-based FSC  
24 coefficient criterion of 0.143.

25

## ResMap Local Resolution Slices

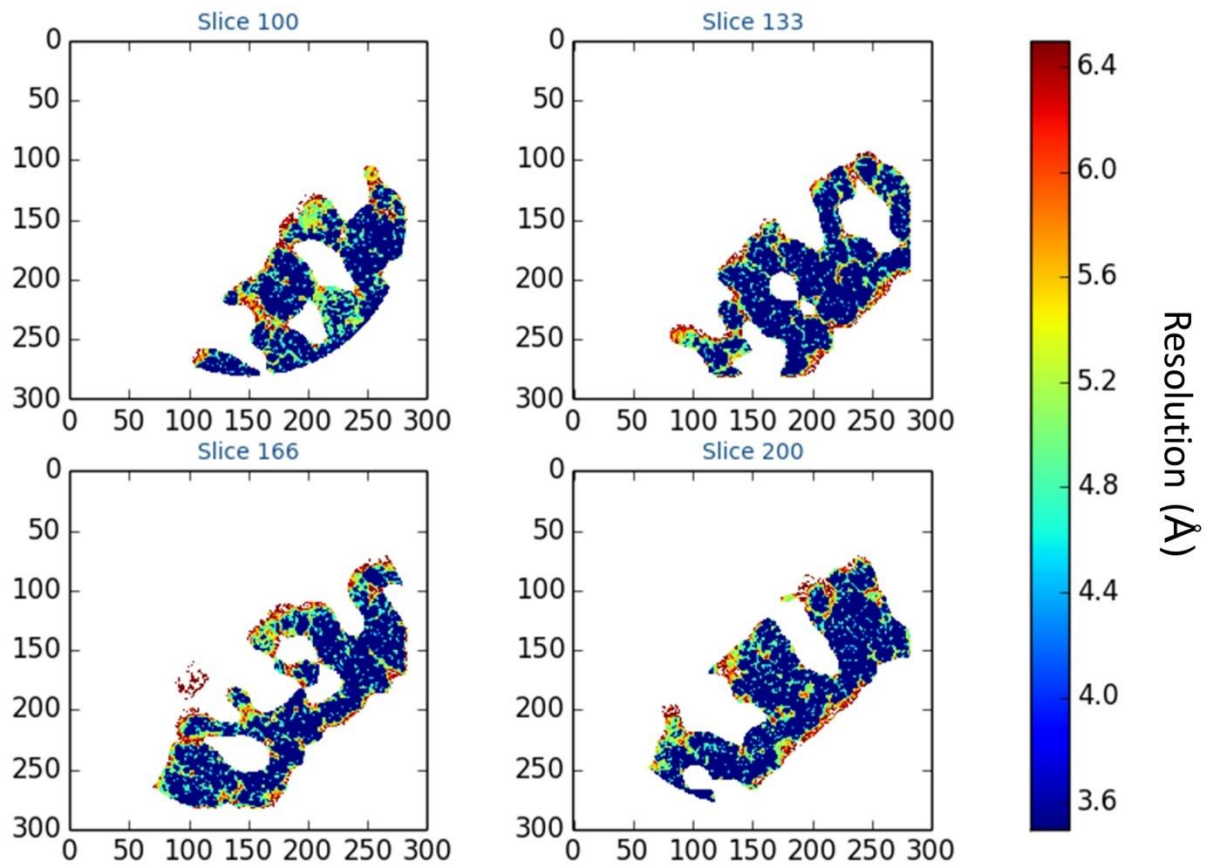

26

27

28 **Figure S3. Local resolution assessment.** Local resolution heat maps of density slices through

29 an asymmetric unit, rendered using ResMap (58). The red through blue color scheme

30 corresponds to regions of relative low through high resolution.

31

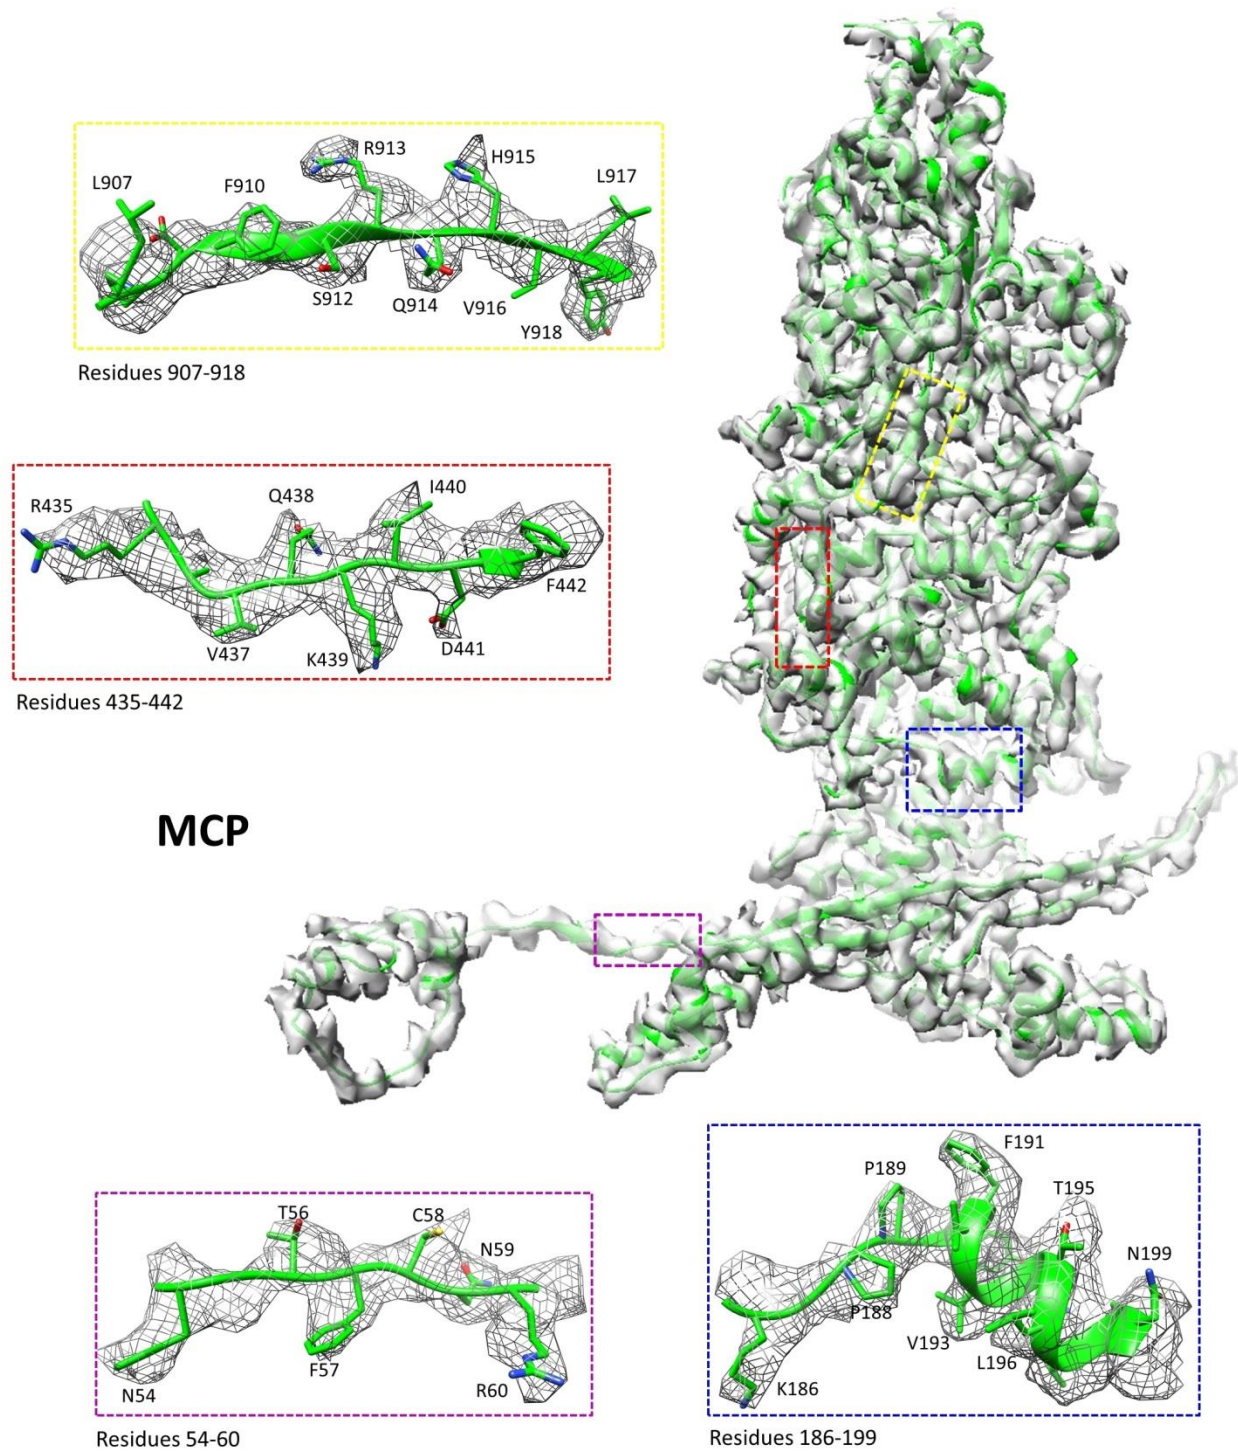

32

33 **Figure S4. Density map and atomic model of MCP.** Insets correspond to zoomed-in views of  
 34 boxed regions and illustrate residue features in the density map (mesh).

35

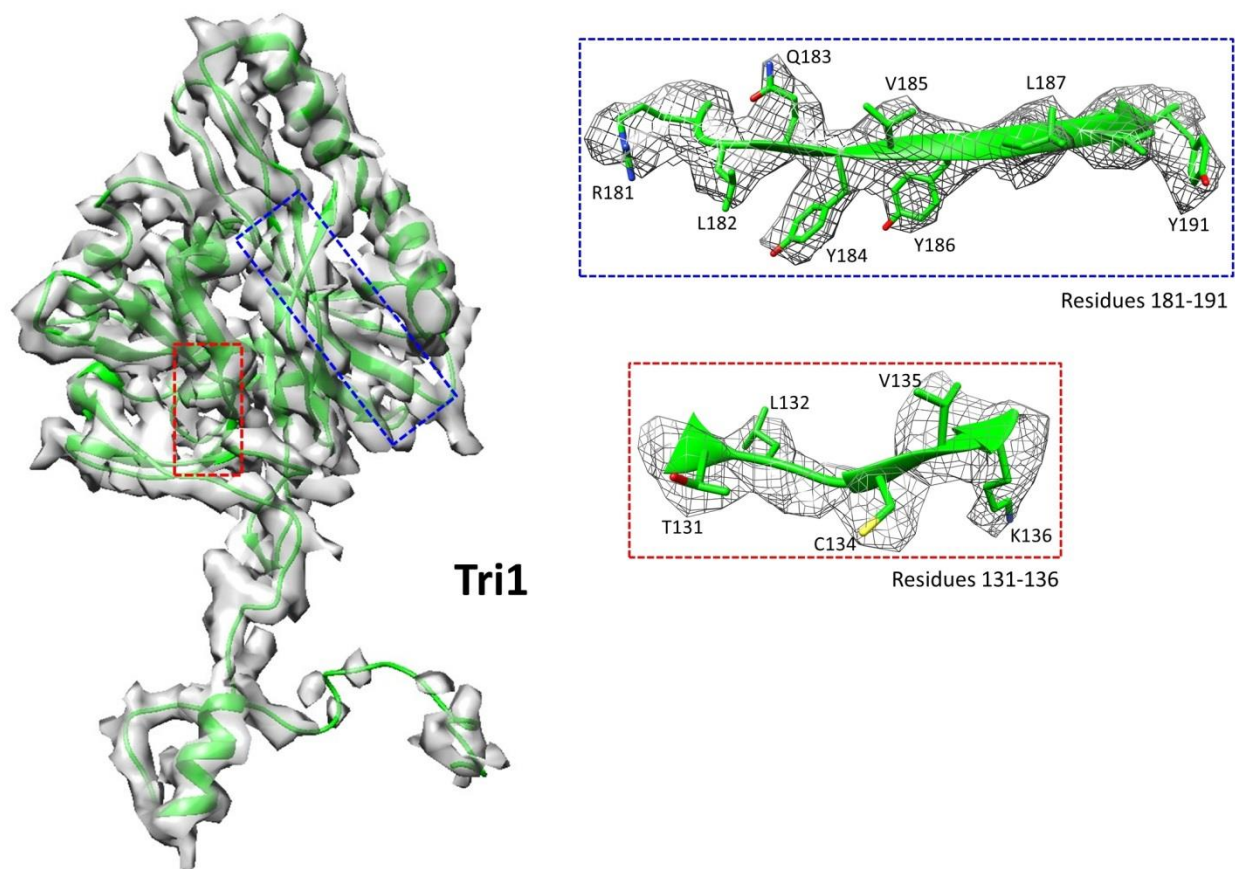

36

37

38 **Figure S5. Density map and atomic model of Tri1.** Insets correspond to zoomed-in views of

39 boxed regions and illustrate residue features in the density map (mesh).

40

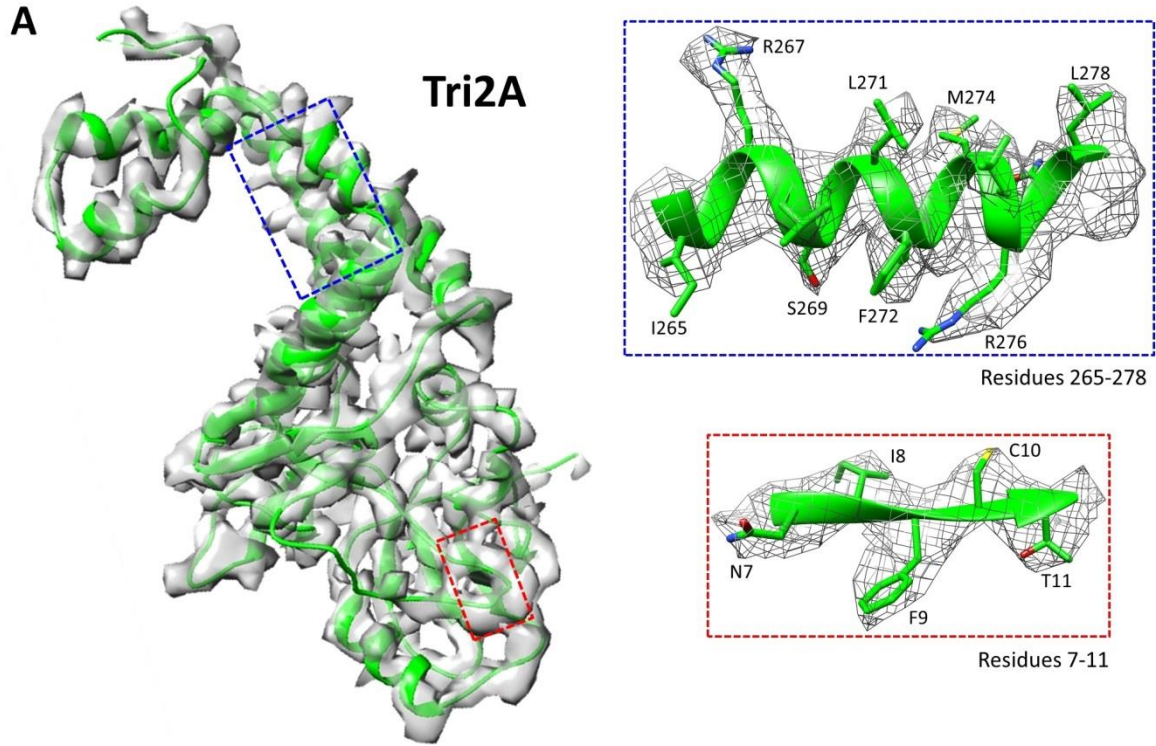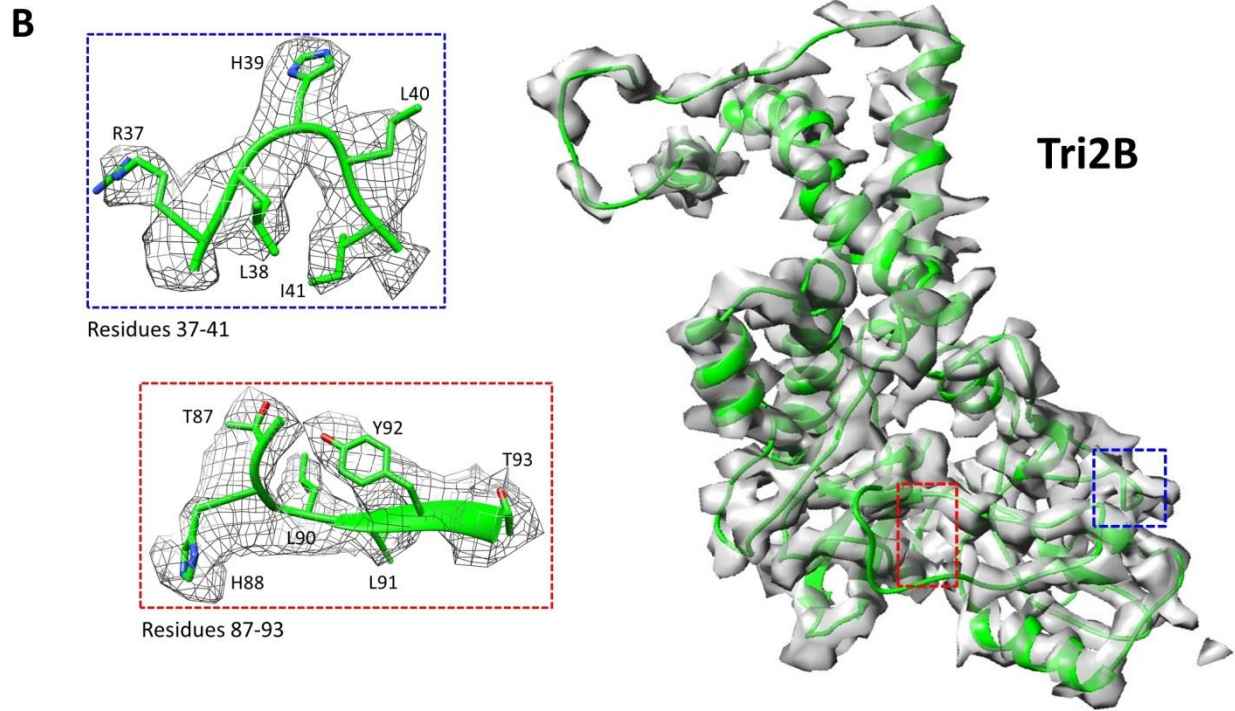



42 **Figure S6. Density maps and atomic models of Tri2 conformers.** (A) Tri2A density map and  
43 ribbon model. (B) Tri2B density map and ribbon model. Insets in (A) and (B) correspond to  
44 zoomed-in views of boxed regions and illustrate residue features in the density map (mesh).  
45

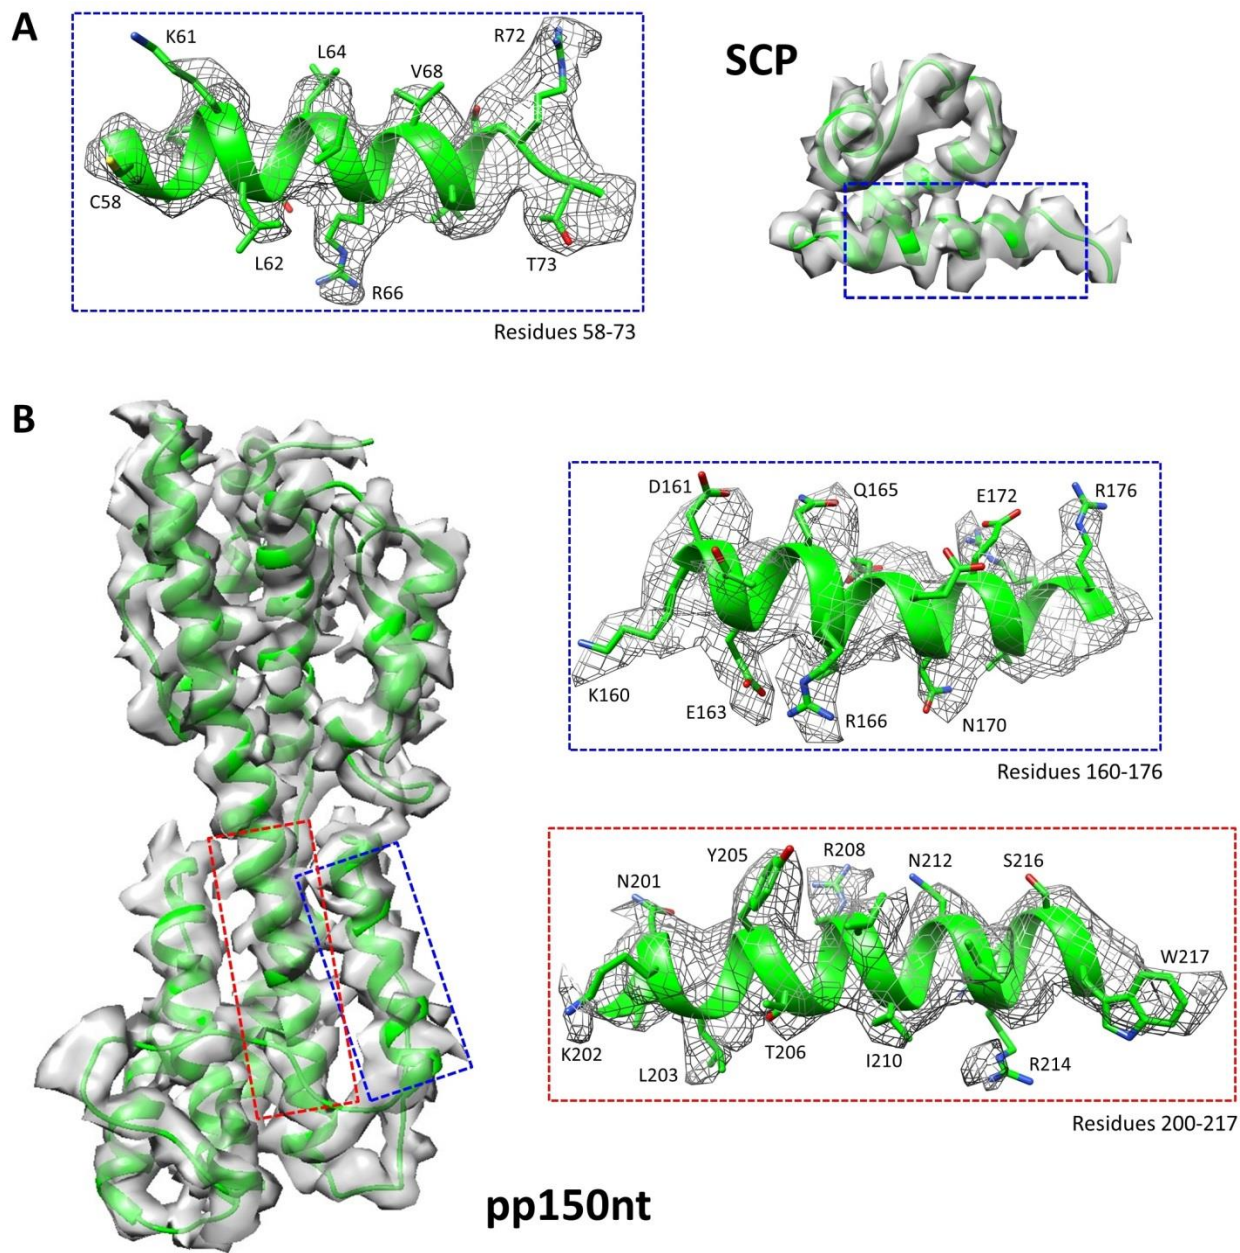

46

47

48 **Figure S7. Density maps and atomic models of SCP and pp150nt. (A)** SCP density map and

49 ribbon model. **(B)** pp150nt density map and ribbon model. Insets in (A) and (B) correspond to

50 zoomed-in views of boxed regions and illustrate residue features in the density map (mesh).

51

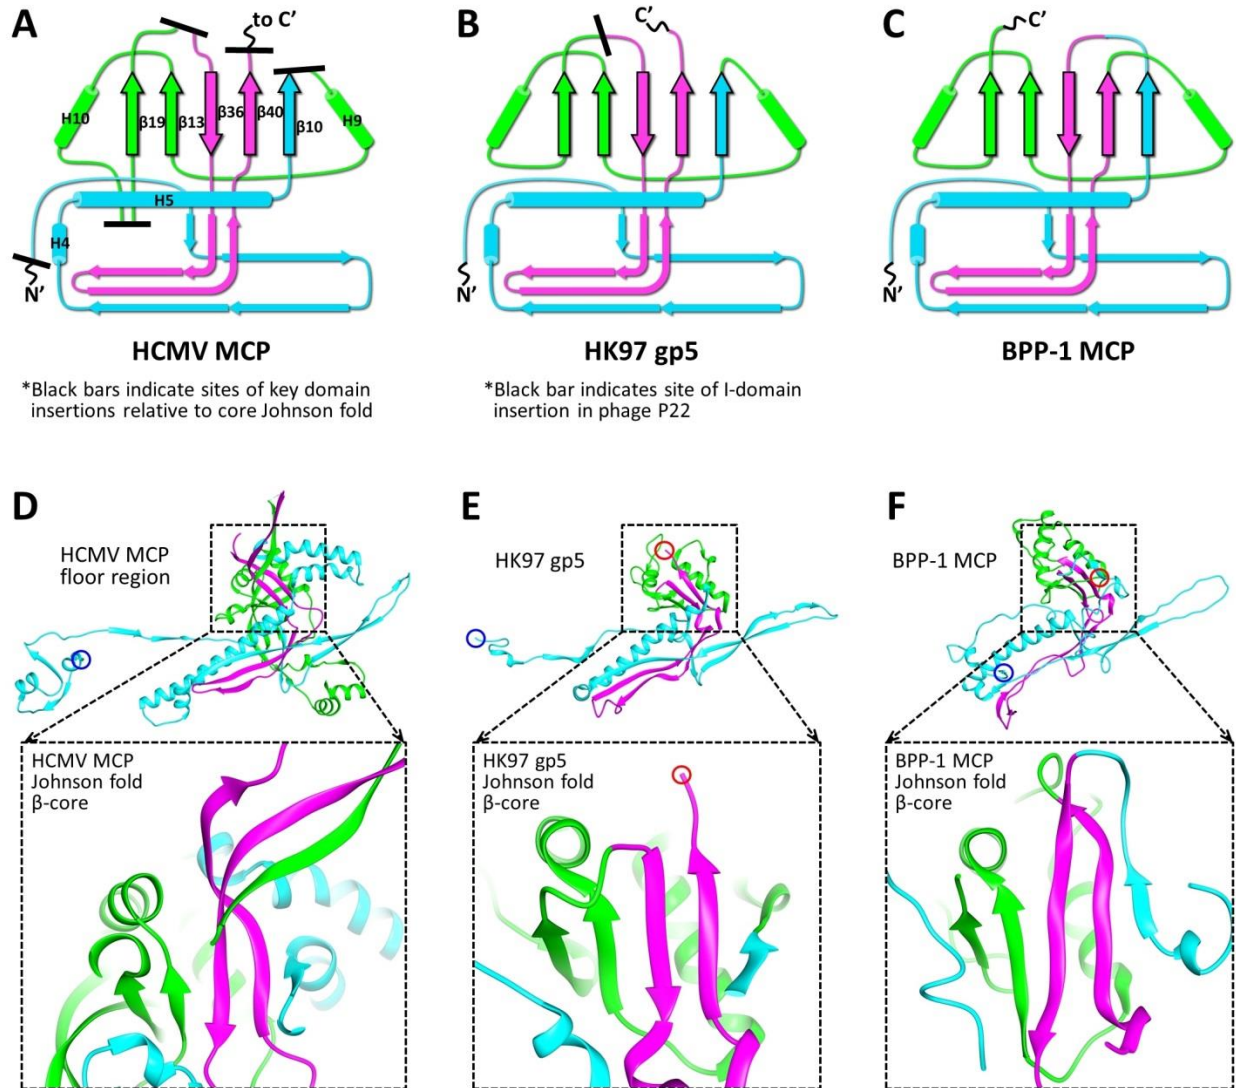

52

53

54 **Figure S8. A comparison of Johnson fold topologies.** (A-C) Schematics depict the Johnson  
 55 fold organization of HCMV MCP, HK97 gp5, and BPP-1 MCP, respectively. Johnson fold N-,  
 56  $\alpha$ -, and  $\beta$ -elements are colored cyan, green, and magenta, respectively. HCMV MCP and HK97  
 57 gp5 share a similar arrangement of Johnson fold elements, while BPP-1 MCP utilizes a different  
 58 permutation of Johnson fold elements (33). Black bars in (A) indicate sites of HCMV MCP  
 59 domain insertions. Black bar in (B) indicates site of I-domain insertion in phage P22 (48). (D-F)

60 Ribbon models of HCMV MCP, HK97 gp5, and BPP-1 MCP, respectively, colored by Johnson  
61 fold element as in (A-C). Insets depict their respective Johnson fold  $\beta$ -cores.

62

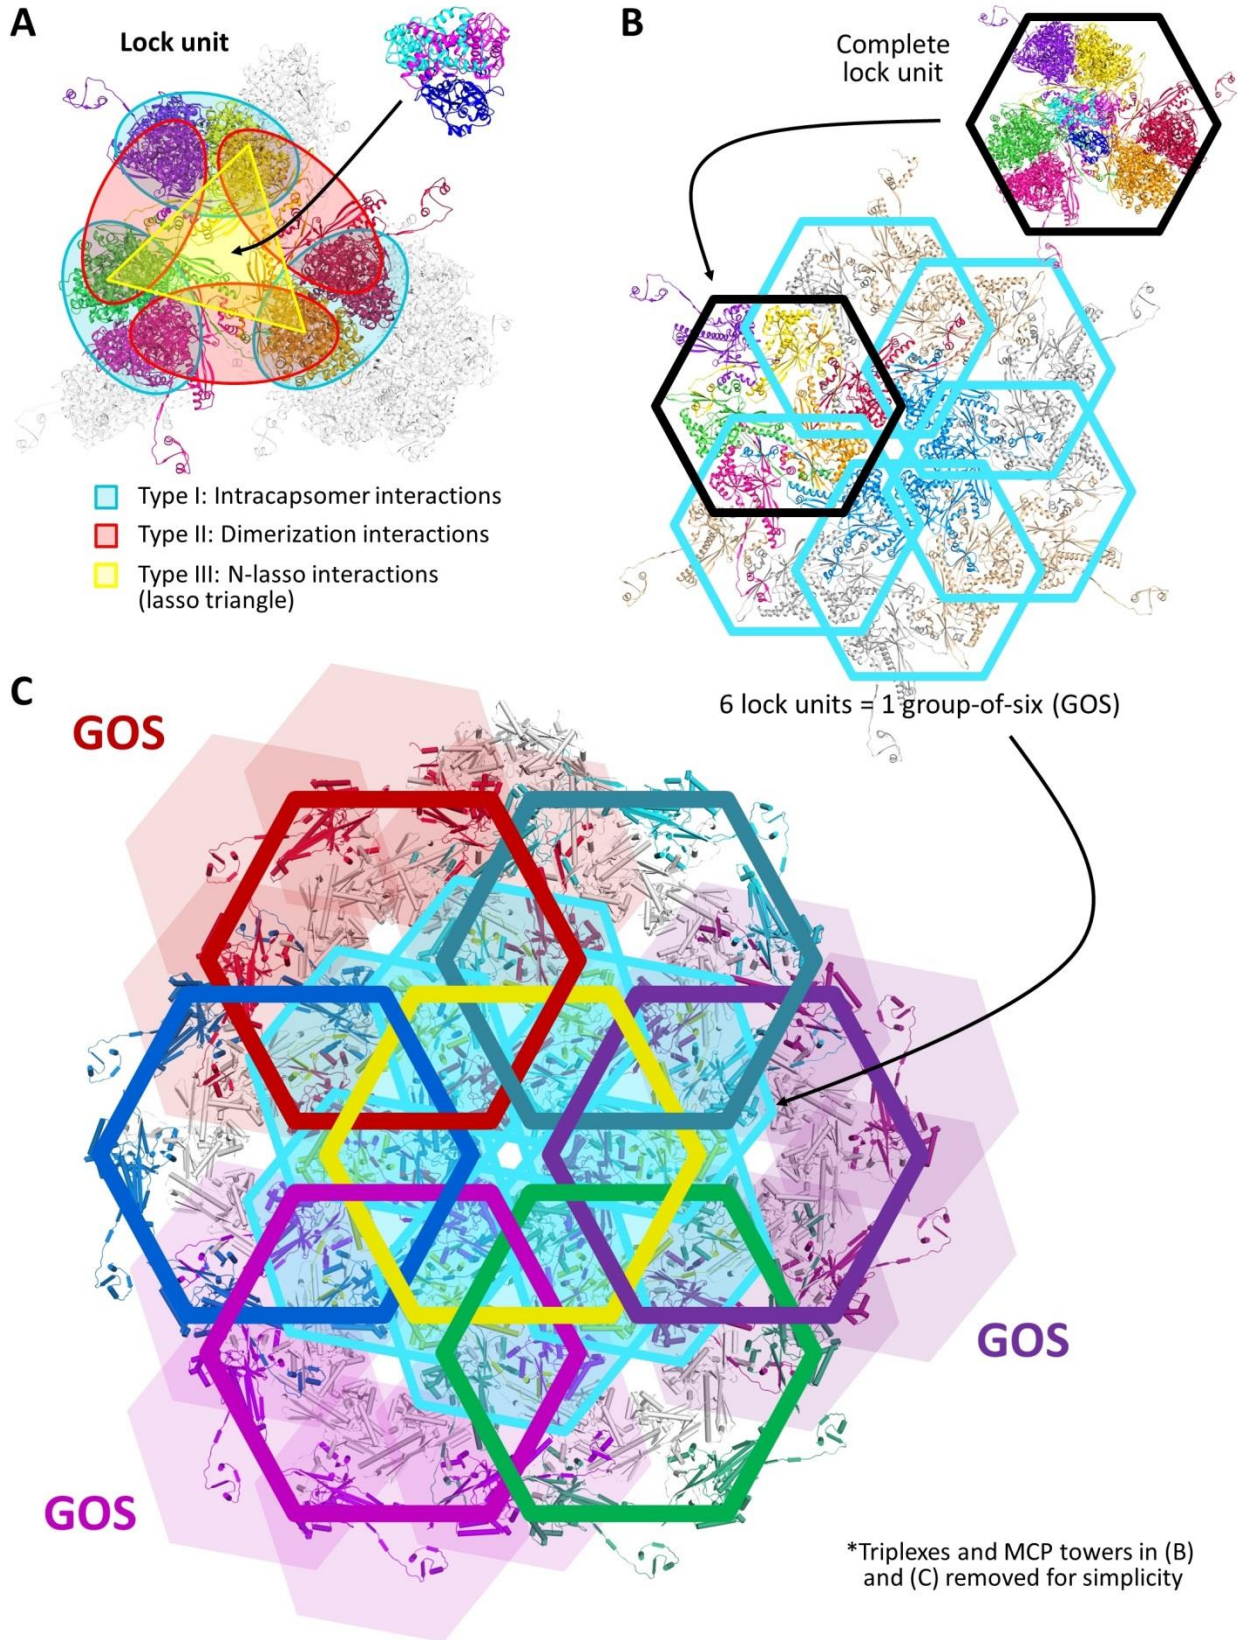

64 **Figure S9. Lock unit interactions and global capsid organization.** (A) A lock unit is  
65 comprised of six MCPs organized around a central triplex. Each lock unit includes a complete set  
66 of all interactions found within the HCMV capsid, including three pairs of type I interactions  
67 (blue), three pairs of type II interactions (red), and three pairs of type III interactions forming one  
68 lasso triangle (yellow), upon which the triplex sits. (B) Lock units are arranged in six  
69 overlapping units such that each hexon is at the center of a lock unit group-of-six (GOS). Each  
70 MCP is included in two lock units and directly interacts with four lock units. Thus, a lock unit  
71 interacts with all lock units within its GOS except the far opposite unit. Intersecting lock unit  
72 boundaries denote direct interactions. (C) A global view of GOSs reveals that each lock unit  
73 (filled hexagons) takes part in three GOSs (blue, teal, and green GOSs not shown for simplicity).  
74 Individual lock units are thus able to interact with nine unique lock units—four from each of  
75 three GOSs, overlap between GOSs not counted. Concatenated rings representing HK97's  
76 covalent chainmail are superposed on overlapping GOSs for comparative reference.

77

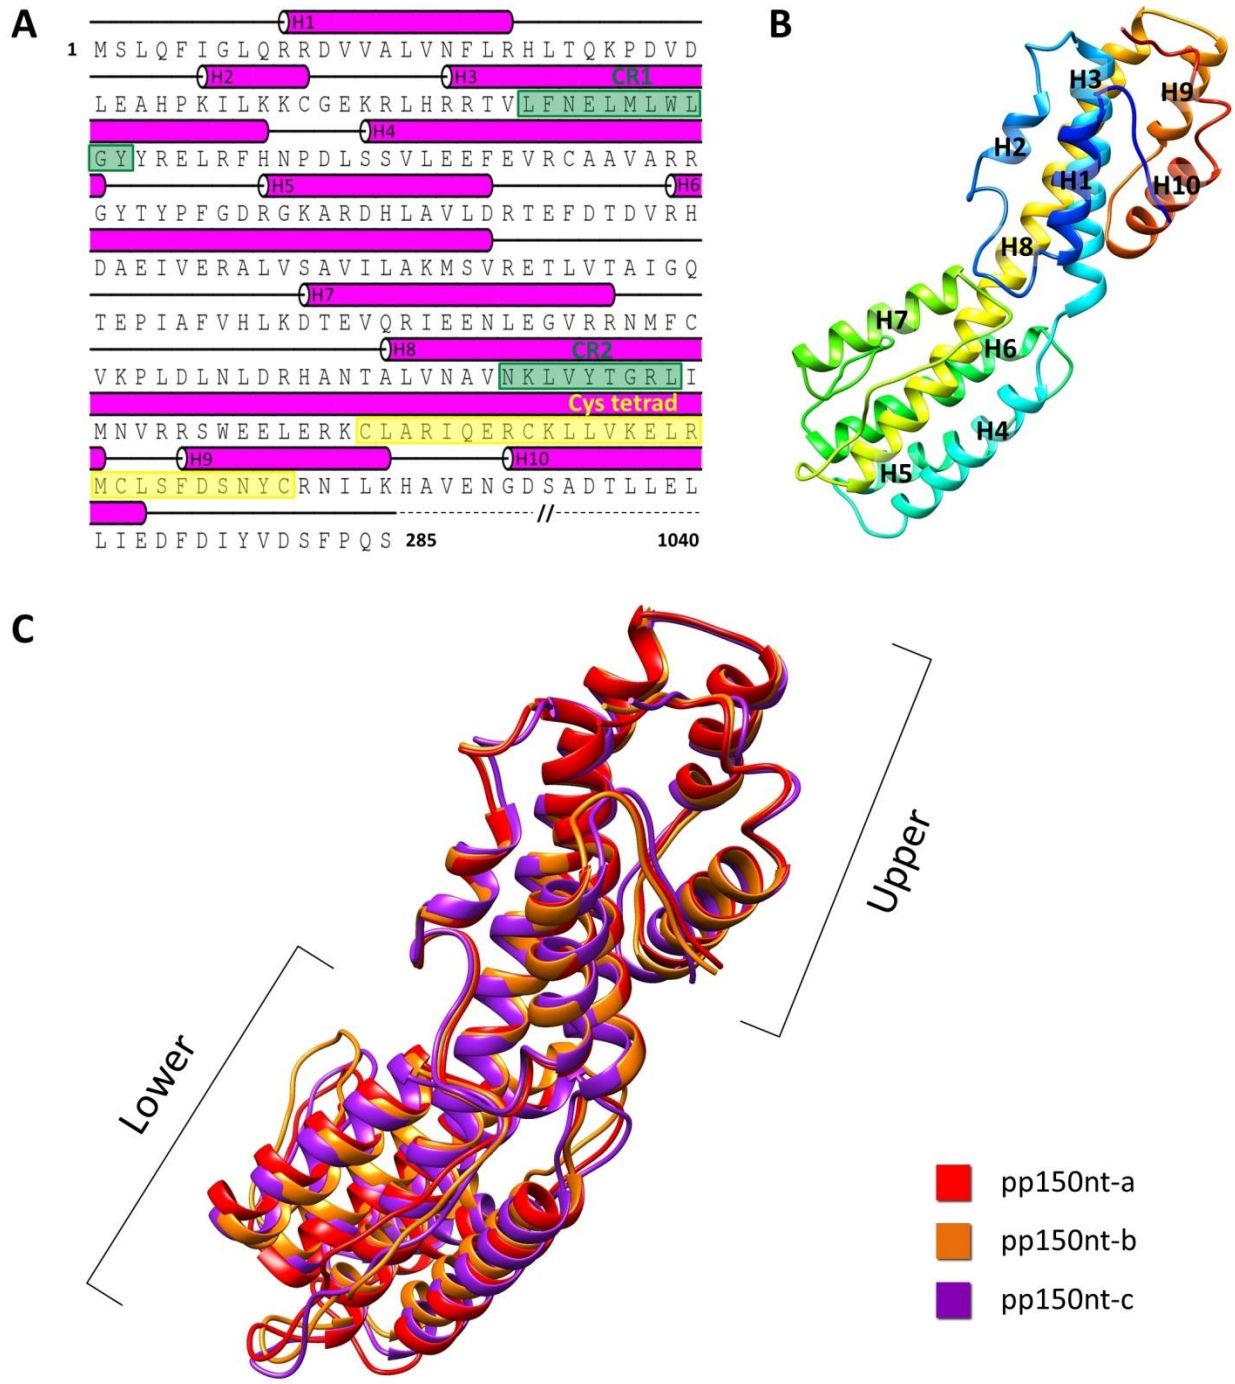

78  
79

80 **Figure S10. Conserved regions and conformers of pp150nt.** (A) Schematic showing the  
81 amino acid sequence and secondary structure of pp150nt. Lines represent loops, and pink  
82 cylinders represent helices.  $\beta$ -herpesvirus-conserved regions CR1 and CR2 are boxed in green,

83 while the primate CMV-conserved cysteine tetrad is boxed in yellow. **(B)** Rainbow ribbon model  
84 (blue at the N terminus through green and yellow to red at the C terminus) of pp150nt with  
85 labeled helices. **(C)** Structural alignment based on  $C\alpha$  positions of the three pp150nt conformers  
86 associated with the Tb triplex reveals a greater degree of structural similarity at the upper helix  
87 bundle compared to the lower helix bundle.



## References and Notes

1. Z. Vancíková, P. Dvorák, Cytomegalovirus infection in immunocompetent and immunocompromised individuals—a review. *Curr. Drug Targets Immune Endocr. Metabol. Disord.* **1**, 179–187 (2001). [doi:10.2174/1568005310101020179](https://doi.org/10.2174/1568005310101020179) [Medline](#)
2. S. P. Adler, Congenital cytomegalovirus screening. *Pediatr. Infect. Dis. J.* **24**, 1105–1106 (2005). [doi:10.1097/00006454-200512000-00016](https://doi.org/10.1097/00006454-200512000-00016) [Medline](#)
3. C. W. Lerner, M. L. Tapper, Opportunistic infection complicating acquired immune deficiency syndrome. Clinical features of 25 cases. *Medicine* **63**, 155–164 (1984). [doi:10.1097/00005792-198405000-00002](https://doi.org/10.1097/00005792-198405000-00002) [Medline](#)
4. D. R. Hoover, A. J. Saah, H. Bacellar, J. Phair, R. Detels, R. Anderson, R. A. Kaslow, Clinical manifestations of AIDS in the era of pneumocystis prophylaxis. Multicenter AIDS Cohort Study. *N. Engl. J. Med.* **329**, 1922–1926 (1993). [doi:10.1056/NEJM199312233292604](https://doi.org/10.1056/NEJM199312233292604) [Medline](#)
5. W. van der Bij, R. Speich, Management of cytomegalovirus infection and disease after solid-organ transplantation. *Clin. Infect. Dis.* **33**, S32–S37 (2001). [doi:10.1086/320902](https://doi.org/10.1086/320902) [Medline](#)
6. P. Ramanan, R. R. Razonable, Cytomegalovirus infections in solid organ transplantation: A review. *Infect. Chemother.* **45**, 260–271 (2013). [doi:10.3947/ic.2013.45.3.260](https://doi.org/10.3947/ic.2013.45.3.260) [Medline](#)
7. A. H. Rook, Interactions of cytomegalovirus with the human immune system. *Rev. Infect. Dis.* **10**, S460–S467 (1988). [doi:10.1093/clinids/10.Supplement\\_3.S460](https://doi.org/10.1093/clinids/10.Supplement_3.S460) [Medline](#)
8. M. J. Cannon, D. S. Schmid, T. B. Hyde, Review of cytomegalovirus seroprevalence and demographic characteristics associated with infection. *Rev. Med. Virol.* **20**, 202–213 (2010). [doi:10.1002/rmv.655](https://doi.org/10.1002/rmv.655) [Medline](#)
9. E. S. Mocarski, C. T. Courcelle, in *Fields Virology*, vol. 2, D. M. Knipe *et al.*, Eds. (Lippincott Williams and Wilkins, 2001), pp. 2629–2674.
10. J. K. Andersen, D. M. Frim, O. Isacson, X. O. Breakefield, Herpesvirus-mediated gene delivery into the rat brain: Specificity and efficiency of the neuron-specific enolase promoter. *Cell. Mol. Neurobiol.* **13**, 503–515 (1993). [doi:10.1007/BF00711459](https://doi.org/10.1007/BF00711459) [Medline](#)
11. H. Li, X. Zhang, Oncolytic HSV as a vector in cancer immunotherapy. *Methods Mol. Biol.* **651**, 279–290 (2010). [doi:10.1007/978-1-60761-786-0\\_16](https://doi.org/10.1007/978-1-60761-786-0_16) [Medline](#)
12. S. G. Hansen, J. C. Ford, M. S. Lewis, A. B. Ventura, C. M. Hughes, L. Coyne-Johnson, N. Whizin, K. Oswald, R. Shoemaker, T. Swanson, A. W. Legasse, M. J. Chiuchiolo, C. L. Parks, M. K. Axthelm, J. A. Nelson, M. A. Jarvis, M. Piatak Jr., J. D. Lifson, L. J. Picker, Profound early control of highly pathogenic SIV by an effector memory T-cell vaccine. *Nature* **473**, 523–527 (2011). [doi:10.1038/nature10003](https://doi.org/10.1038/nature10003) [Medline](#)
13. S. G. Hansen, M. Piatak Jr., A. B. Ventura, C. M. Hughes, R. M. Gilbride, J. C. Ford, K. Oswald, R. Shoemaker, Y. Li, M. S. Lewis, A. N. Gilliam, G. Xu, N. Whizin, B. J. Burwitz, S. L. Planer, J. M. Turner, A. W. Legasse, M. K. Axthelm, J. A. Nelson, K. Früh, J. B. Sacha, J. D. Estes, B. F. Keele, P. T. Edlefsen, J. D. Lifson, L. J. Picker,

- Immune clearance of highly pathogenic SIV infection. *Nature* **502**, 100–104 (2013). [doi:10.1038/nature12519](https://doi.org/10.1038/nature12519) [Medline](#)
14. A. J. Davison, A. Dolan, P. Akter, C. Addison, D. J. Dargan, D. J. Alcendor, D. J. McGeoch, G. S. Hayward, The human cytomegalovirus genome revisited: Comparison with the chimpanzee cytomegalovirus genome. *J. Gen. Virol.* **84**, 17–28 (2003). [doi:10.1099/vir.0.18606-0](https://doi.org/10.1099/vir.0.18606-0) [Medline](#)
  15. D. Bhella, F. J. Rixon, D. J. Dargan, Cryomicroscopy of human cytomegalovirus virions reveals more densely packed genomic DNA than in herpes simplex virus type 1. *J. Mol. Biol.* **295**, 155–161 (2000). [doi:10.1006/jmbi.1999.3344](https://doi.org/10.1006/jmbi.1999.3344) [Medline](#)
  16. D. W. Bauer, J. B. Huffman, F. L. Homa, A. Evilevitch, Herpes virus genome, the pressure is on. *J. Am. Chem. Soc.* **135**, 11216–11221 (2013). [doi:10.1021/ja404008r](https://doi.org/10.1021/ja404008r) [Medline](#)
  17. M. K. Baxter, W. Gibson, Cytomegalovirus basic phosphoprotein (pUL32) binds to capsids in vitro through its amino one-third. *J. Virol.* **75**, 6865–6873 (2001). [doi:10.1128/JVI.75.15.6865-6873.2001](https://doi.org/10.1128/JVI.75.15.6865-6873.2001) [Medline](#)
  18. X. Yu, S. Shah, M. Lee, W. Dai, P. Lo, W. Britt, H. Zhu, F. Liu, Z. H. Zhou, Biochemical and structural characterization of the capsid-bound tegument proteins of human cytomegalovirus. *J. Struct. Biol.* **174**, 451–460 (2011). [doi:10.1016/j.jsb.2011.03.006](https://doi.org/10.1016/j.jsb.2011.03.006) [Medline](#)
  19. X. Dai, X. Yu, H. Gong, X. Jiang, G. Abenes, H. Liu, S. Shivakoti, W. J. Britt, H. Zhu, F. Liu, Z. H. Zhou, The smallest capsid protein mediates binding of the essential tegument protein pp150 to stabilize DNA-containing capsids in human cytomegalovirus. *PLoS Pathog.* **9**, e1003525 (2013). [doi:10.1371/journal.ppat.1003525](https://doi.org/10.1371/journal.ppat.1003525) [Medline](#)
  20. P. A. Leong, X. Yu, Z. H. Zhou, G. J. Jensen, Correcting for the ewald sphere in high-resolution single-particle reconstructions. *Methods Enzymol.* **482**, 369–380 (2010). [doi:10.1016/S0076-6879\(10\)82015-4](https://doi.org/10.1016/S0076-6879(10)82015-4) [Medline](#)
  21. X. Zhang, Z. H. Zhou, Limiting factors in atomic resolution cryo electron microscopy: No simple tricks. *J. Struct. Biol.* **175**, 253–263 (2011). [doi:10.1016/j.jsb.2011.05.004](https://doi.org/10.1016/j.jsb.2011.05.004) [Medline](#)
  22. A. Amunts, A. Brown, X. C. Bai, J. L. Llácer, T. Hussain, P. Emsley, F. Long, G. Murshudov, S. H. Scheres, V. Ramakrishnan, Structure of the yeast mitochondrial large ribosomal subunit. *Science* **343**, 1485–1489 (2014). [doi:10.1126/science.1249410](https://doi.org/10.1126/science.1249410) [Medline](#)
  23. P. Lu, X. C. Bai, D. Ma, T. Xie, C. Yan, L. Sun, G. Yang, Y. Zhao, R. Zhou, S. H. Scheres, Y. Shi, Three-dimensional structure of human  $\gamma$ -secretase. *Nature* **512**, 166–170 (2014). [doi:10.1038/nature13567](https://doi.org/10.1038/nature13567) [Medline](#)
  24. A. Merk, A. Bartesaghi, S. Banerjee, V. Falconieri, P. Rao, M. I. Davis, R. Pragani, M. B. Boxer, L. A. Earl, J. L. Milne, S. Subramaniam, Breaking cryo-EM resolution barriers to facilitate drug discovery. *Cell* **165**, 1698–1707 (2016). [doi:10.1016/j.cell.2016.05.040](https://doi.org/10.1016/j.cell.2016.05.040) [Medline](#)
  25. D. Veessler, T. S. Ng, A. K. Sendamarai, B. J. Eilers, C. M. Lawrence, S. M. Lok, M. J. Young, J. E. Johnson, C. Y. Fu, Atomic structure of the 75 MDa extremophile *Sulfolobus*

- turreted icosahedral virus determined by CryoEM and X-ray crystallography. *Proc. Natl. Acad. Sci. U.S.A.* **110**, 5504–5509 (2013). [doi:10.1073/pnas.1300601110](https://doi.org/10.1073/pnas.1300601110) [Medline](#)
26. X. Yu, J. Jiang, J. Sun, Z. H. Zhou, A putative ATPase mediates RNA transcription and capping in a dsRNA virus. *eLife* **4**, e07901 (2015). [doi:10.7554/eLife.07901](https://doi.org/10.7554/eLife.07901) [Medline](#)
27. D. Sirohi, Z. Chen, L. Sun, T. Klose, T. C. Pierson, M. G. Rossmann, R. J. Kuhn, The 3.8 Å resolution cryo-EM structure of Zika virus. *Science* **352**, 467–470 (2016). [doi:10.1126/science.aaf5316](https://doi.org/10.1126/science.aaf5316) [Medline](#)
28. A. Huet, A. M. Makhov, J. B. Huffman, M. Vos, F. L. Homa, J. F. Conway, Extensive subunit contacts underpin herpesvirus capsid stability and interior-to-exterior allostery. *Nat. Struct. Mol. Biol.* **23**, 531–539 (2016). [doi:10.1038/nsmb.3212](https://doi.org/10.1038/nsmb.3212) [Medline](#)
29. X. Dai, D. Gong, Y. Xiao, T. T. Wu, R. Sun, Z. H. Zhou, CryoEM and mutagenesis reveal that the smallest capsid protein cements and stabilizes Kaposi's sarcoma-associated herpesvirus capsid. *Proc. Natl. Acad. Sci. U.S.A.* **112**, E649–E656 (2015). [doi:10.1073/pnas.1420317112](https://doi.org/10.1073/pnas.1420317112) [Medline](#)
30. Z. H. Zhou, D. H. Chen, J. Jakana, F. J. Rixon, W. Chiu, Visualization of tegument-capsid interactions and DNA in intact herpes simplex virus type 1 virions. *J. Virol.* **73**, 3210–3218 (1999). [Medline](#)
31. W. R. Wikoff, L. Liljas, R. L. Duda, H. Tsuruta, R. W. Hendrix, J. E. Johnson, Topologically linked protein rings in the bacteriophage HK97 capsid. *Science* **289**, 2129–2133 (2000). [doi:10.1126/science.289.5487.2129](https://doi.org/10.1126/science.289.5487.2129) [Medline](#)
32. A. Fokine, P. G. Leiman, M. M. Shneider, B. Ahvazi, K. M. Boeshans, A. C. Steven, L. W. Black, V. V. Mesyanzhinov, M. G. Rossmann, Structural and functional similarities between the capsid proteins of bacteriophages T4 and HK97 point to a common ancestry. *Proc. Natl. Acad. Sci. U.S.A.* **102**, 7163–7168 (2005). [doi:10.1073/pnas.0502164102](https://doi.org/10.1073/pnas.0502164102) [Medline](#)
33. X. Zhang, H. Guo, L. Jin, E. Czornyj, A. Hodes, W. H. Hui, A. W. Nieh, J. F. Miller, Z. H. Zhou, A new topology of the HK97-like fold revealed in *Bordetella* bacteriophage by cryoEM at 3.5 Å resolution. *eLife* **2**, e01299 (2013). [doi:10.7554/eLife.01299](https://doi.org/10.7554/eLife.01299) [Medline](#)
34. M. L. Baker, W. Jiang, F. J. Rixon, W. Chiu, Common ancestry of herpesviruses and tailed DNA bacteriophages. *J. Virol.* **79**, 14967–14970 (2005). [doi:10.1128/JVI.79.23.14967-14970.2005](https://doi.org/10.1128/JVI.79.23.14967-14970.2005) [Medline](#)
35. B. R. Bowman, M. L. Baker, F. J. Rixon, W. Chiu, F. A. Quijcho, Structure of the herpesvirus major capsid protein. *EMBO J.* **22**, 757–765 (2003). [doi:10.1093/emboj/cdg086](https://doi.org/10.1093/emboj/cdg086) [Medline](#)
36. W. W. Newcomb, B. L. Trus, F. P. Booy, A. C. Steven, J. S. Wall, J. C. Brown, Structure of the herpes simplex virus capsid. Molecular composition of the pentons and the triplexes. *J. Mol. Biol.* **232**, 499–511 (1993). [doi:10.1006/jmbi.1993.1406](https://doi.org/10.1006/jmbi.1993.1406) [Medline](#)
37. R. Zandi, D. Reguera, Mechanical properties of viral capsids. *Phys. Rev. E Stat. Nonlin. Soft Matter Phys.* **72**, 021917 (2005). [doi:10.1103/PhysRevE.72.021917](https://doi.org/10.1103/PhysRevE.72.021917) [Medline](#)

38. Z. H. Zhou, J. He, J. Jakana, J. D. Tatman, F. J. Rixon, W. Chiu, Assembly of VP26 in herpes simplex virus-1 inferred from structures of wild-type and recombinant capsids. *Nat. Struct. Biol.* **2**, 1026–1030 (1995). [doi:10.1038/nsb1195-1026](https://doi.org/10.1038/nsb1195-1026) [Medline](#)
39. L. Lai, W. J. Britt, The interaction between the major capsid protein and the smallest capsid protein of human cytomegalovirus is dependent on two linear sequences in the smallest capsid protein. *J. Virol.* **77**, 2730–2735 (2003). [doi:10.1128/JVI.77.4.2730-2735.2003](https://doi.org/10.1128/JVI.77.4.2730-2735.2003) [Medline](#)
40. J. F. Conway, S. K. Cockrell, A. M. Copeland, W. W. Newcomb, J. C. Brown, F. L. Homa, Labeling and localization of the herpes simplex virus capsid protein UL25 and its interaction with the two triplexes closest to the penton. *J. Mol. Biol.* **397**, 575–586 (2010). [doi:10.1016/j.jmb.2010.01.043](https://doi.org/10.1016/j.jmb.2010.01.043) [Medline](#)
41. K. Toropova, J. B. Huffman, F. L. Homa, J. F. Conway, The herpes simplex virus 1 UL17 protein is the second constituent of the capsid vertex-specific component required for DNA packaging and retention. *J. Virol.* **85**, 7513–7522 (2011). [doi:10.1128/JVI.00837-11](https://doi.org/10.1128/JVI.00837-11) [Medline](#)
42. X. Dai, D. Gong, T. T. Wu, R. Sun, Z. H. Zhou, Organization of capsid-associated tegument components in Kaposi's sarcoma-associated herpesvirus. *J. Virol.* **88**, 12694–12702 (2014). [doi:10.1128/JVI.01509-14](https://doi.org/10.1128/JVI.01509-14) [Medline](#)
43. U. Sae-Ueng, T. Liu, C. E. Catalano, J. B. Huffman, F. L. Homa, A. Evilevitch, Major capsid reinforcement by a minor protein in herpesviruses and phage. *Nucleic Acids Res.* **42**, 9096–9107 (2014). [doi:10.1093/nar/gku634](https://doi.org/10.1093/nar/gku634) [Medline](#)
44. D. P. AuCoin, G. B. Smith, C. D. Meiering, E. S. Mocarski, Betaherpesvirus-conserved cytomegalovirus tegument protein ppUL32 (pp150) controls cytoplasmic events during virion maturation. *J. Virol.* **80**, 8199–8210 (2006). [doi:10.1128/JVI.00457-06](https://doi.org/10.1128/JVI.00457-06) [Medline](#)
45. J. Kindt, S. Tzllil, A. Ben-Shaul, W. M. Gelbart, DNA packaging and ejection forces in bacteriophage. *Proc. Natl. Acad. Sci. U.S.A.* **98**, 13671–13674 (2001). [doi:10.1073/pnas.241486298](https://doi.org/10.1073/pnas.241486298) [Medline](#)
46. A. Evilevitch, L. Lavelle, C. M. Knobler, E. Raspaud, W. M. Gelbart, Osmotic pressure inhibition of DNA ejection from phage. *Proc. Natl. Acad. Sci. U.S.A.* **100**, 9292–9295 (2003). [doi:10.1073/pnas.1233721100](https://doi.org/10.1073/pnas.1233721100) [Medline](#)
47. Z. H. Zhou, J. Chiou, Protein chainmail variants in dsDNA viruses. *AIMS Biophys.* **2**, 200–218 (2015). [doi:10.3934/biophy.2015.2.200](https://doi.org/10.3934/biophy.2015.2.200)
48. A. A. Rizzo, M. M. Suhanovsky, M. L. Baker, L. C. Fraser, L. M. Jones, D. L. Rempel, M. L. Gross, W. Chiu, A. T. Alexandrescu, C. M. Teschke, Multiple functional roles of the accessory I-domain of bacteriophage P22 coat protein revealed by NMR structure and CryoEM modeling. *Structure* **22**, 830–841 (2014). [doi:10.1016/j.str.2014.04.003](https://doi.org/10.1016/j.str.2014.04.003) [Medline](#)
49. G. C. Lander, A. Evilevitch, M. Jeembaeva, C. S. Potter, B. Carragher, J. E. Johnson, Bacteriophage lambda stabilization by auxiliary protein gpD: Timing, location, and mechanism of attachment determined by cryo-EM. *Structure* **16**, 1399–1406 (2008). [doi:10.1016/j.str.2008.05.016](https://doi.org/10.1016/j.str.2008.05.016) [Medline](#)

50. B. Carragher, N. Kisseberth, D. Kriegman, R. A. Milligan, C. S. Potter, J. Pulokas, A. Reilein, Legimon: An automated system for acquisition of images from vitreous ice specimens. *J. Struct. Biol.* **132**, 33–45 (2000). [doi:10.1006/jsbi.2000.4314](https://doi.org/10.1006/jsbi.2000.4314) [Medline](#)
51. C. Suloway, J. Pulokas, D. Fellmann, A. Cheng, F. Guerra, J. Quispe, S. Stagg, C. S. Potter, B. Carragher, Automated molecular microscopy: The new Legimon system. *J. Struct. Biol.* **151**, 41–60 (2005). [doi:10.1016/j.jsb.2005.03.010](https://doi.org/10.1016/j.jsb.2005.03.010) [Medline](#)
52. X. Li, P. Mooney, S. Zheng, C. R. Booth, M. B. Braunfeld, S. Gubbens, D. A. Agard, Y. Cheng, Electron counting and beam-induced motion correction enable near-atomic-resolution single-particle cryo-EM. *Nat. Methods* **10**, 584–590 (2013). [doi:10.1038/nmeth.2472](https://doi.org/10.1038/nmeth.2472) [Medline](#)
53. J. A. Mindell, N. Grigorieff, Accurate determination of local defocus and specimen tilt in electron microscopy. *J. Struct. Biol.* **142**, 334–347 (2003). [doi:10.1016/S1047-8477\(03\)00069-8](https://doi.org/10.1016/S1047-8477(03)00069-8) [Medline](#)
54. Y. Liang, E. Y. Ke, Z. H. Zhou, IMIRS: A high-resolution 3D reconstruction package integrated with a relational image database. *J. Struct. Biol.* **137**, 292–304 (2002). [doi:10.1016/S1047-8477\(02\)00014-X](https://doi.org/10.1016/S1047-8477(02)00014-X) [Medline](#)
55. S. J. Ludtke, P. R. Baldwin, W. Chiu, EMAN: Semiautomated software for high-resolution single-particle reconstructions. *J. Struct. Biol.* **128**, 82–97 (1999). [doi:10.1006/jsbi.1999.4174](https://doi.org/10.1006/jsbi.1999.4174) [Medline](#)
56. X. Zhang, X. Zhang, Z. H. Zhou, Low cost, high performance GPU computing solution for atomic resolution cryoEM single-particle reconstruction. *J. Struct. Biol.* **172**, 400–406 (2010). [doi:10.1016/j.jsb.2010.05.006](https://doi.org/10.1016/j.jsb.2010.05.006) [Medline](#)
57. P. B. Rosenthal, R. Henderson, Optimal determination of particle orientation, absolute hand, and contrast loss in single-particle electron cryomicroscopy. *J. Mol. Biol.* **333**, 721–745 (2003). [doi:10.1016/j.jmb.2003.07.013](https://doi.org/10.1016/j.jmb.2003.07.013) [Medline](#)
58. A. Kucukelbir, F. J. Sigworth, H. D. Tagare, Quantifying the local resolution of cryo-EM density maps. *Nat. Methods* **11**, 63–65 (2014). [doi:10.1038/nmeth.2727](https://doi.org/10.1038/nmeth.2727) [Medline](#)
59. Y. Wan, W. Chiu, Z. H. Zhou, in *2004 International Conference on Communications, Circuits and Systems* (Institute of Electrical and Electronics Engineers, 2004), pp. 960–964.
60. Z. H. Zhou, Atomic resolution cryo electron microscopy of macromolecular complexes. *Adv. Protein Chem. Struct. Biol.* **82**, 1–35 (2011). [doi:10.1016/B978-0-12-386507-6.00001-4](https://doi.org/10.1016/B978-0-12-386507-6.00001-4) [Medline](#)
61. D. J. DeRosier, Correction of high-resolution data for curvature of the Ewald sphere. *Ultramicroscopy* **81**, 83–98 (2000). [doi:10.1016/S0304-3991\(99\)00120-5](https://doi.org/10.1016/S0304-3991(99)00120-5) [Medline](#)
62. E. F. Pettersen, T. D. Goddard, C. C. Huang, G. S. Couch, D. M. Greenblatt, E. C. Meng, T. E. Ferrin, UCSF Chimera—a visualization system for exploratory research and analysis. *J. Comput. Chem.* **25**, 1605–1612 (2004). [doi:10.1002/jcc.20084](https://doi.org/10.1002/jcc.20084) [Medline](#)
63. P. Emsley, K. Cowtan, Coot: Model-building tools for molecular graphics. *Acta Crystallogr. D Biol. Crystallogr.* **60**, 2126–2132 (2004). [doi:10.1107/S0907444904019158](https://doi.org/10.1107/S0907444904019158) [Medline](#)

64. A. Drozdetskiy, C. Cole, J. Procter, G. J. Barton, JPred4: A protein secondary structure prediction server. *Nucleic Acids Res.* **43**, W389–W394 (2015). [doi:10.1093/nar/gkv332](https://doi.org/10.1093/nar/gkv332) [Medline](#)
65. L. A. Kelley, S. Mezulis, C. M. Yates, M. N. Wass, M. J. Sternberg, The Phyre2 web portal for protein modeling, prediction and analysis. *Nat. Protoc.* **10**, 845–858 (2015). [doi:10.1038/nprot.2015.053](https://doi.org/10.1038/nprot.2015.053) [Medline](#)
66. P. D. Adams, P. V. Afonine, G. Bunkóczi, V. B. Chen, I. W. Davis, N. Echols, J. J. Headd, L. W. Hung, G. J. Kapral, R. W. Grosse-Kunstleve, A. J. McCoy, N. W. Moriarty, R. Oeffner, R. J. Read, D. C. Richardson, J. S. Richardson, T. C. Terwilliger, P. H. Zwart, *PHENIX*: A comprehensive Python-based system for macromolecular structure solution. *Acta Crystallogr. D Biol. Crystallogr.* **66**, 213–221 (2010). [doi:10.1107/S09074444909052925](https://doi.org/10.1107/S09074444909052925) [Medline](#)
